# Supplementary material
Source: Springer Nature journal article supplement (https://www.springermedizin.de/resource/supplementary/12887_2012_736_MOESM2_ESM.pdf/9475630)

## District Hospitals

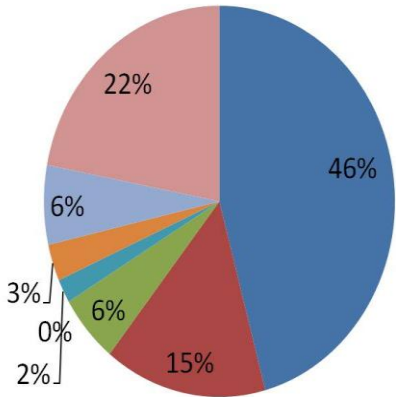

## Sub-district hospitals

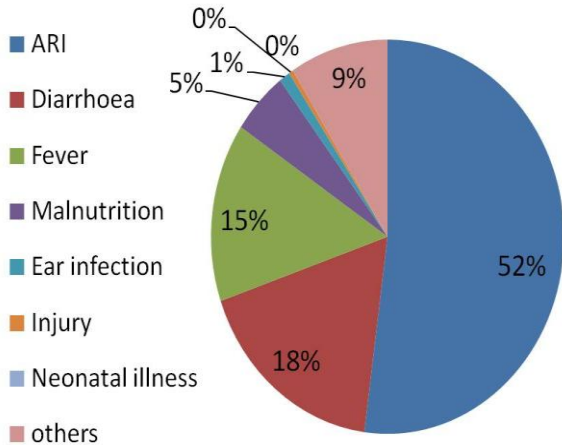

Source: Hospital Routine MIS

Supplement: MOESM2 [file 9475630]
